# Supplementary material for: Clusterin ameliorates tau pathology in vivo by inhibiting fibril formation
Source: PubMed Central journal article supplement (PMC7708249; doi:10.1186/s40478-020-01079-1), 2020-12-01

| Neuropathological diagnosis | Normal Control | Alzheimer's disease | Corticobasal degeneration | Pick's disease |
|-----------------------------|----------------|---------------------|---------------------------|----------------|
| Braak tangle stage          | 1              | 5                   | 3                         | 2              |
| Thal amyloid phase          | 0              | 5                   | 0                         | 0              |
| Age                         | 73             | 69                  | 75                        | 59             |

| Neuropathological diagnosis       | Normal Control (N=10) | Alzheimer's disease (N=10) | Corticobasal degeneration (N=15) | Pick's disease (N=12) |
|-----------------------------------|-----------------------|----------------------------|----------------------------------|-----------------------|
| Median Braak tangle stage (range) | 2 (1-3)               | 6 (6)                      | 2 (0-4)                          | 2 (0-3)               |
| Median Thal amyloid phase (range) | 0 (0-1)               | 5 (5)                      | 0 (0-2)                          | 0 (0-3)               |
| Median age (range)                | 71.5 (60-78)          | 66 (56-75)                 | 67 (58-77)                       | 65.5 (53-84)          |
| Female (%)                        | 4/10 (40%)            | 6/10 (60%)                 | 6/15 (40%)                       | 5/12 (42%)            |

**a**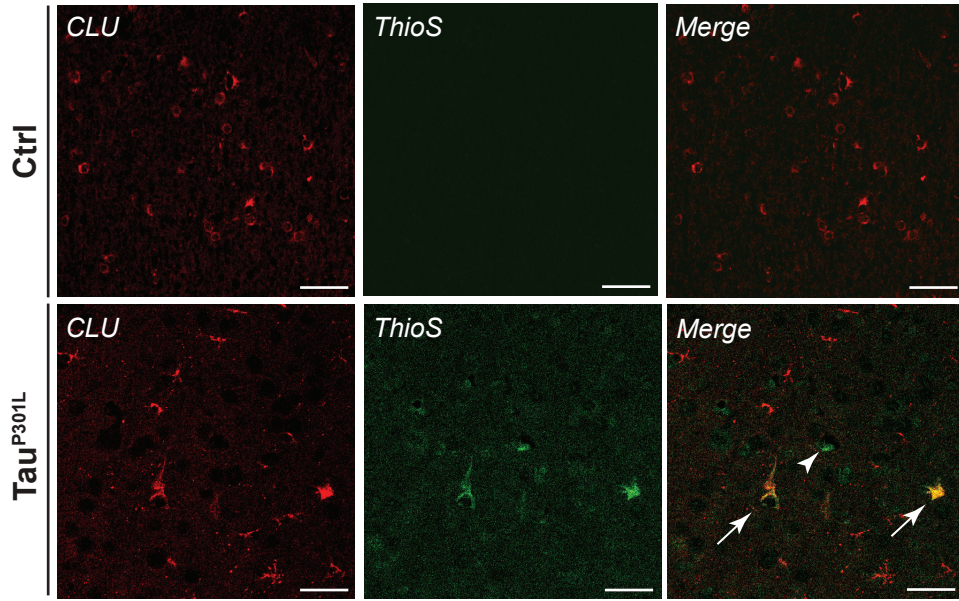**b**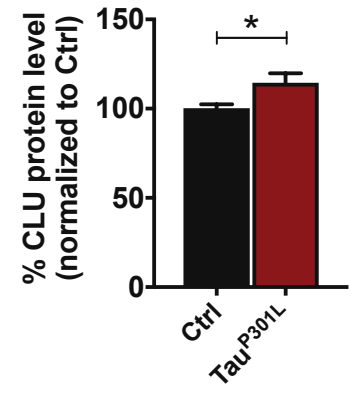

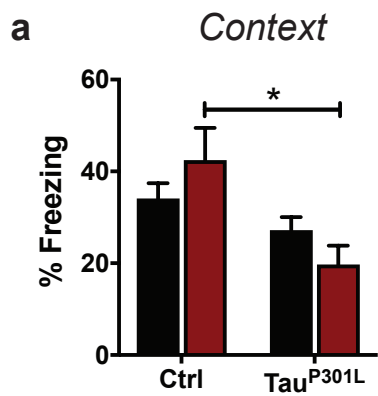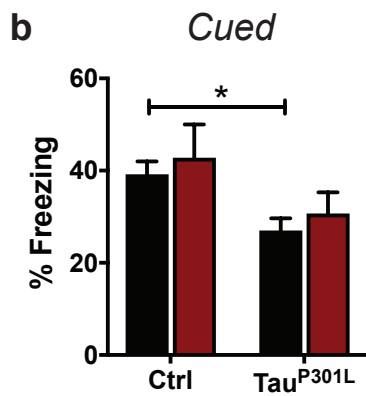

**a**

**CLU WT**

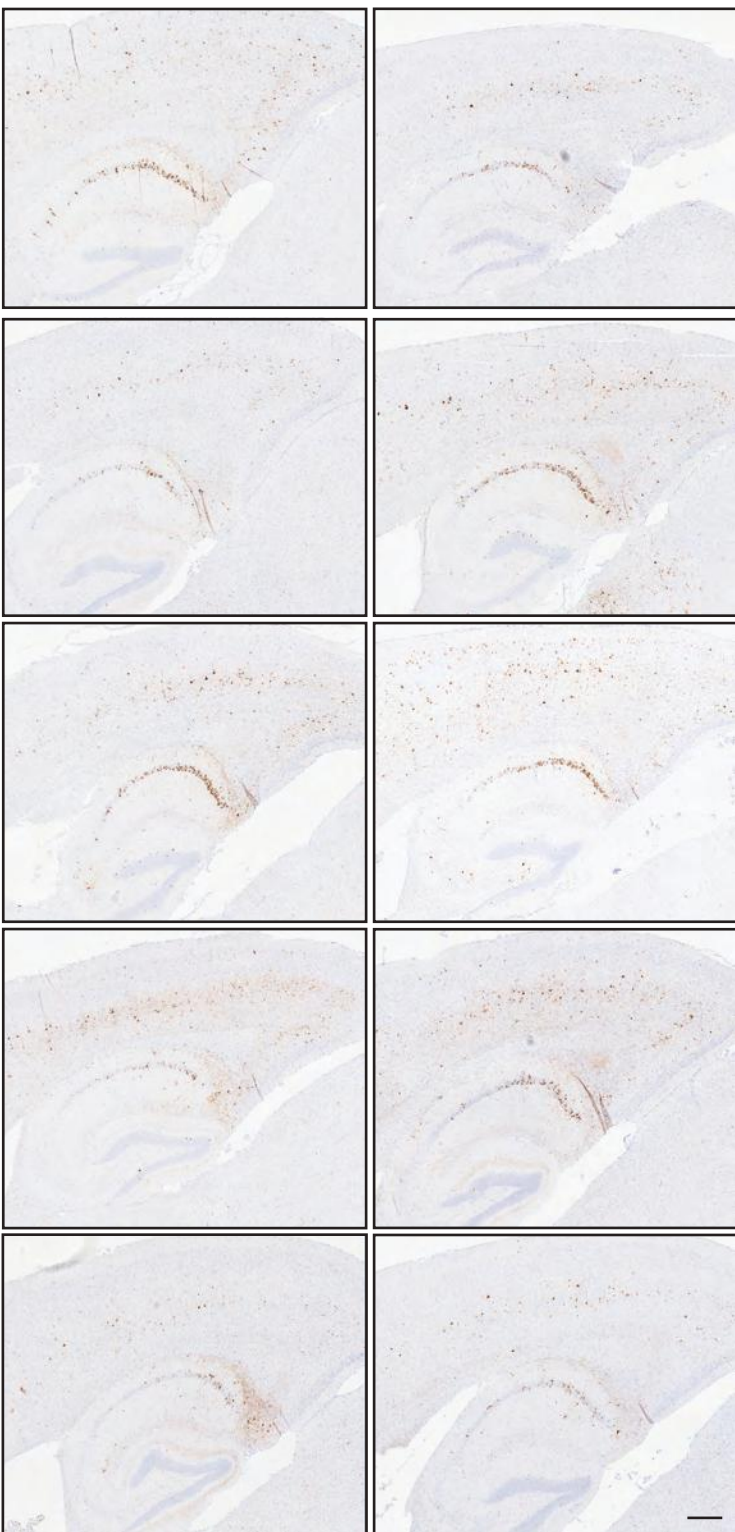

**CLU KO**

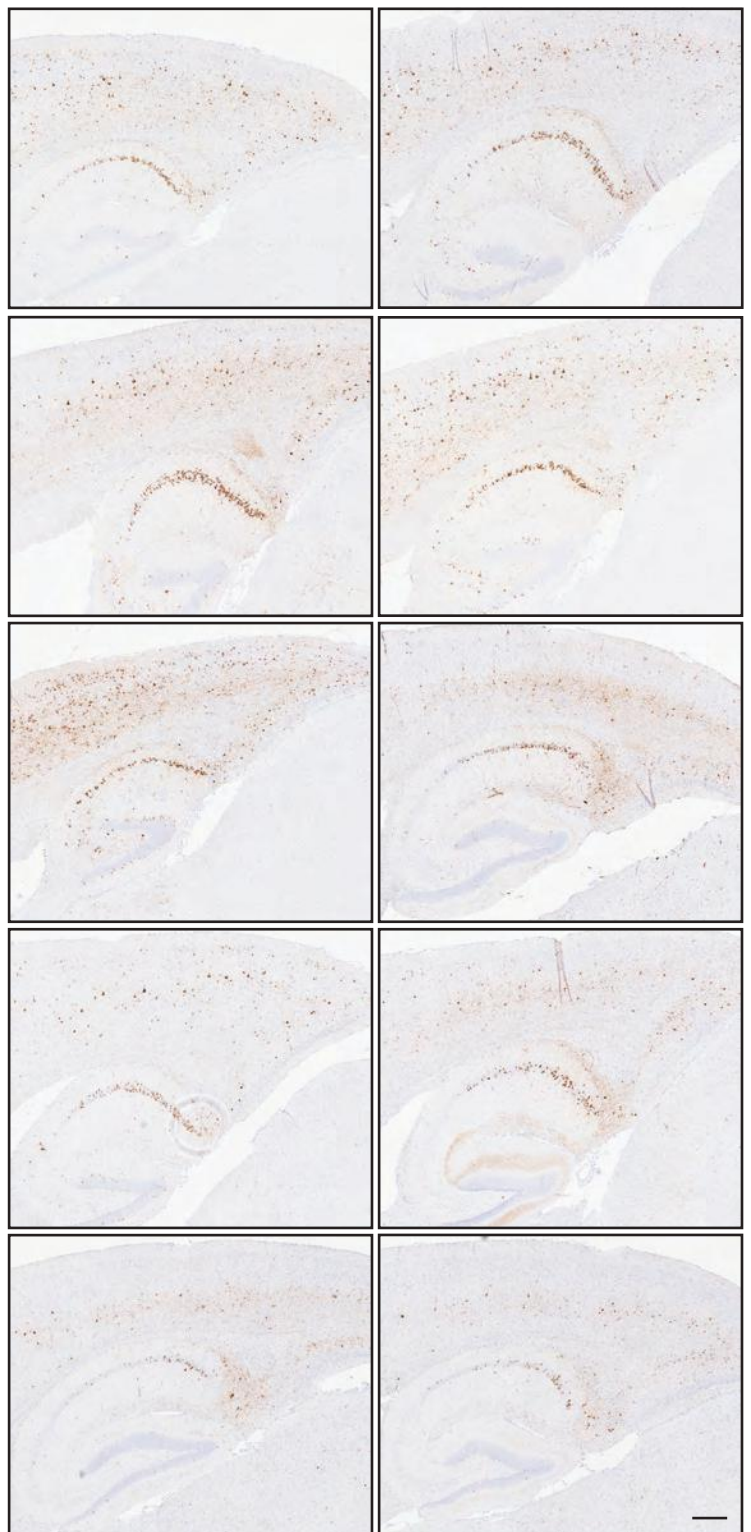

**a** Gallyas silver stain

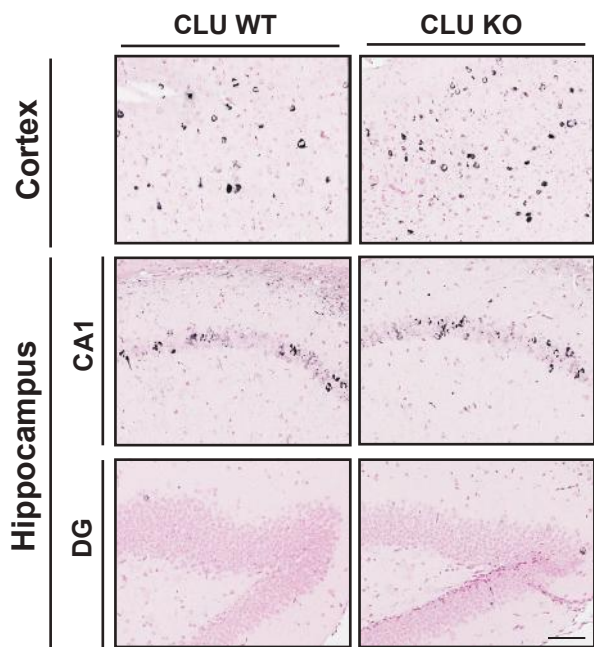

**b**

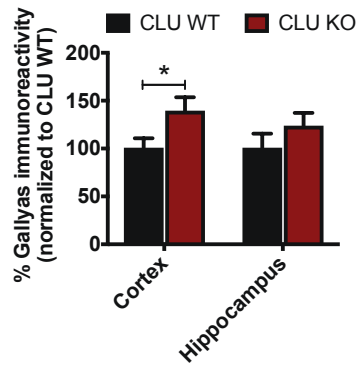

**c**

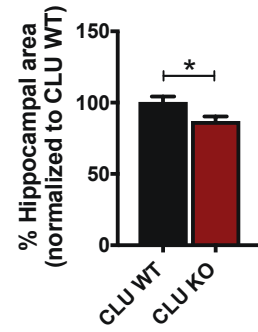



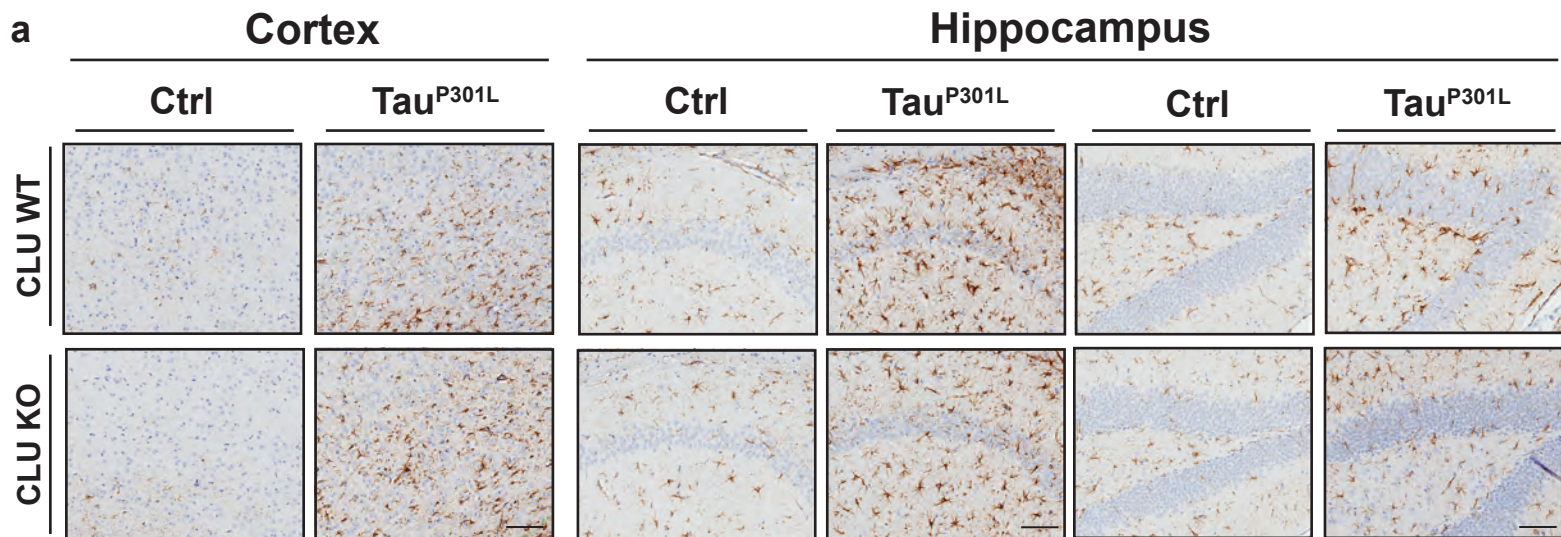

■ CLU WT ■ CLU KO

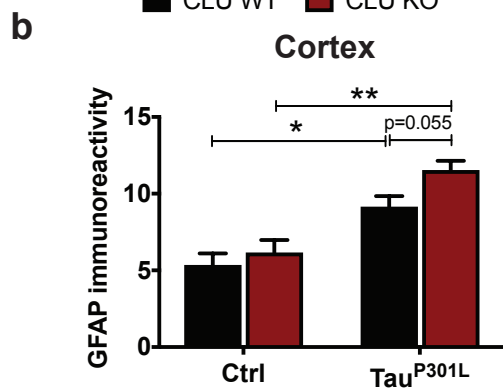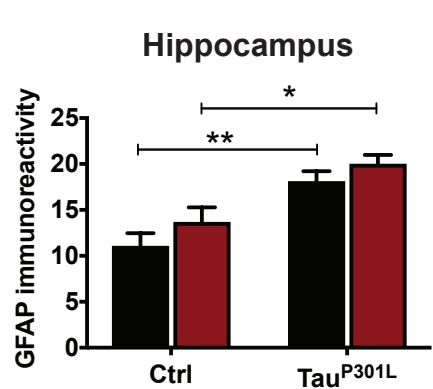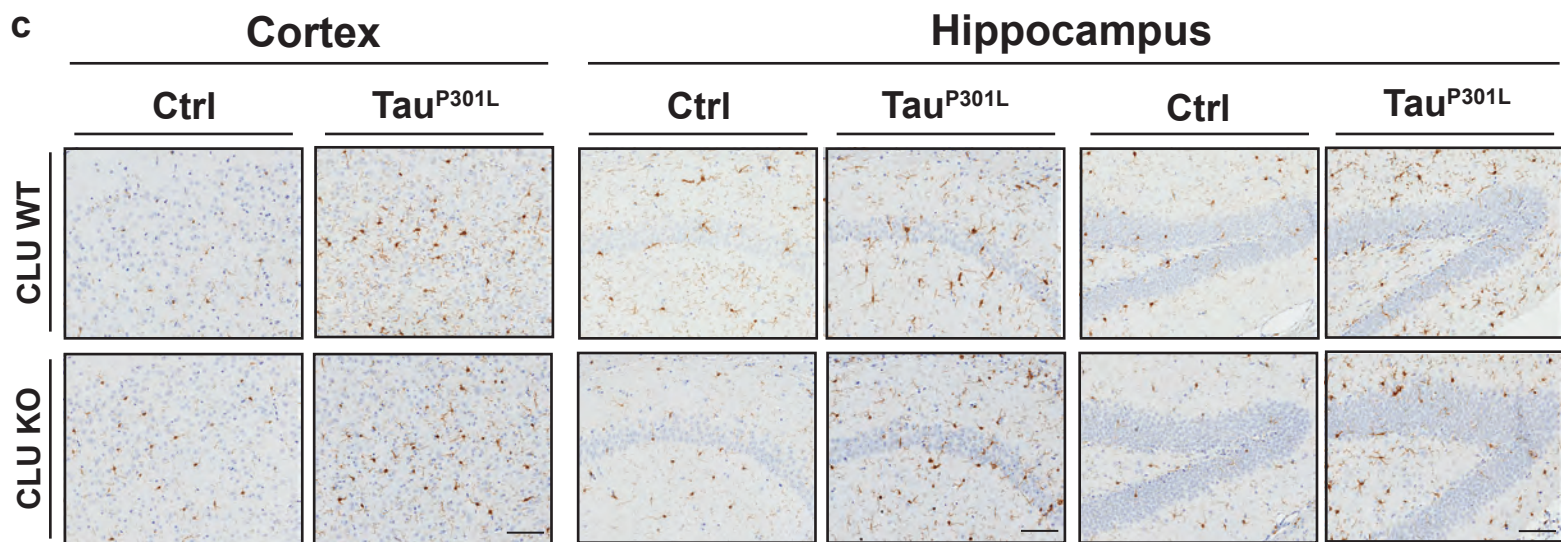

■ CLU WT ■ CLU KO

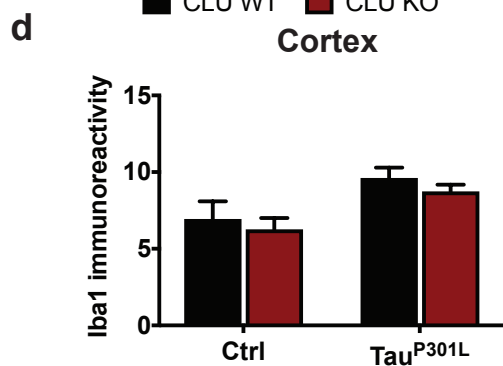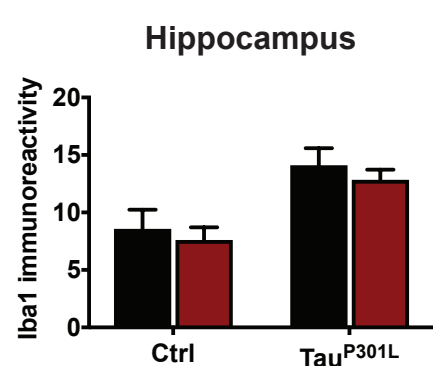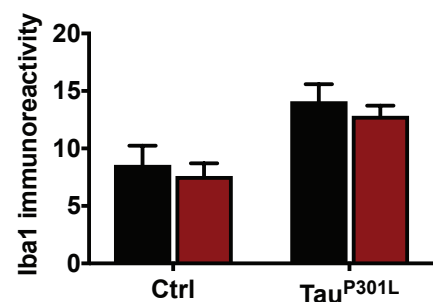

Supplement: 40478_2020_1079_MOESM1_ESM.pdf [file 40478_2020_1079_MOESM1_ESM.pdf]
